# Supplementary material
Source: PubMed Central journal article supplement (PMC4892108)

# Supplementary Figure S1

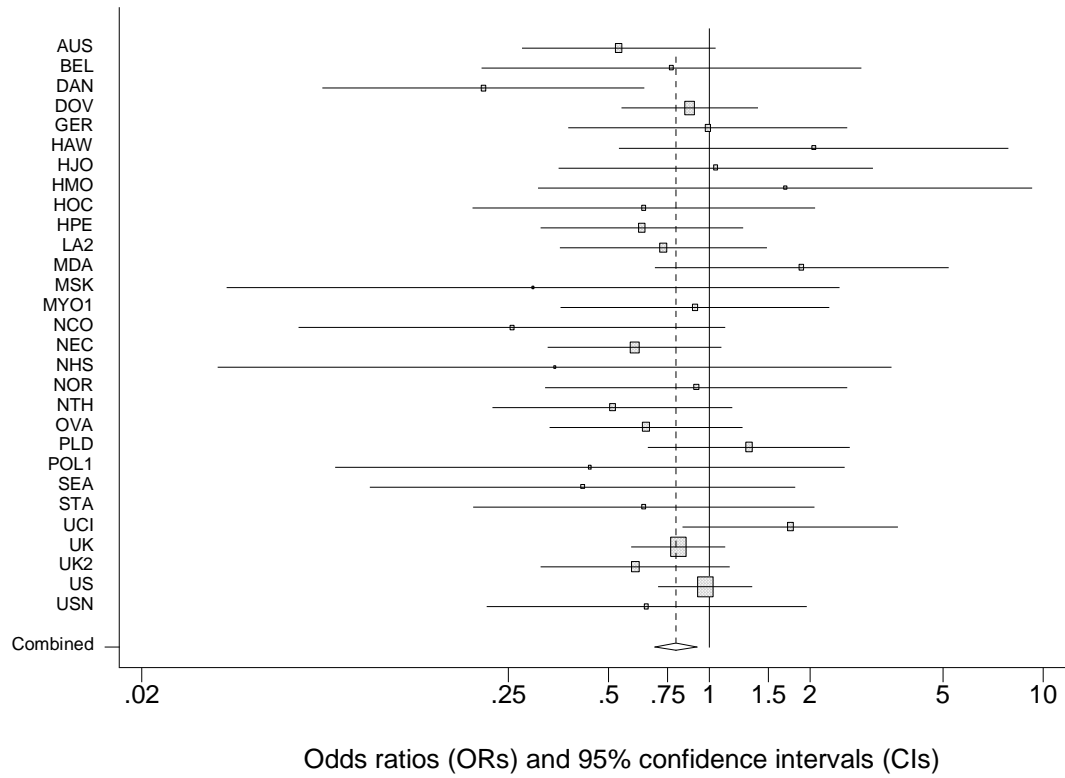

Supplement: NIHMS661240-supplement-1.pdf [file NIHMS661240-supplement-1.pdf]
